# Supplementary material for: High efficiency dye-sensitized nanocrystalline solar cells based on ionic liquid polymer gel electrolyte
Source: Royal Society of Chemistry journal article supplement (doi:10.1039/b209322g), 2002-01-01
Supplement: b209322g.doc [file b209322g.doc]

Photoelectrodes used in dye-sensitized solar cells consist of a TiO2 double-layer structure film (7 m thickness of 16 nm transparent and 2 m thickness of 400 nm scattering anatase particles). The TiO2 particles prepared using a reported procedure1 were screen-printed onto a conducting glass substrate (F-doped SnO2 TEC 15, 15 cm2). The resultant 9 m thickness of TiO2 electrodes were dye-coated by immersing them into a 0.3 mmol l1 solution of dye Z-907 in CH3CN and *t*-butanol (volume ratio: 1:1) at room temperature for 12 hours and then assembled with thermally platinized conducting glass electrodes.12 The electrodes were spaced with 35 m thickness of Bynel ring from DuPont and sealed up by heating. PVDF-HFP polymer (20 mg) dissolved in acetonitrile (0.2 ml) was mixed with the so-called blank liquid electrolyte (180 mg) consisting of iodine (0.5 mol l1) and NMBI (0.45 mol l1) in MPII. Here acetonitrile was used as plasticizer of PVDF-HFP. The internal space was filled with the resulting solution using a vacuum pump and then heated the electrode to 110 oC (even though the boiling point of acetonitrile is 82 oC it increases by mixing with ionic liquids) under vacuum to remove acetonitrile. This procedure was repeated several times to form a uniform layer of solid-state polymer gel inside the cells. The electrolyte-injecting hole made by a sand-ejecting drill on the counter electrode glass substrate was sealed with a Bynel sheet and a glass cover shell by heating. In order to have a good comparison with the polymer gel electrolyte, the blank liquid electrolyte (180 mg) and acetonitrile (0.2 ml) were mixed and the internal space was filled with the resulting solution as described above.

1. C. J. Barbé, F. Arendse, P. Comte, M. Jirousek, F. Lenzmann, V. Shklover and M. Grätzel, *J. Am. Ceram. Soc*., 1997, **80**, 3157.
2. N. Pappageorgiou, W. F. Maier and M. Grätzel, *J. Electrochem. Soc*., 1997, **144**, 876.
